# Supplementary material
Source: PubMed Central journal article supplement (PMC8606147)
Supplement: boe-12-11-7009-s001.pdf [file boe-12-11-7009-s001.pdf]

## Label-free imaging of age-related cardiac structural changes in non-human primates using multiphoton nonlinear microscopy: supplement

**AMARA KHAN,<sup>1,2</sup>  FERNANDA RAMOS-GOMES,<sup>1</sup> ANDREA MARKUS,<sup>1</sup> MATTHIAS MIETSCH,<sup>2,3</sup> RABEA HINKEL,<sup>2,3,4</sup> AND FRAUKE ALVES<sup>1,2,5,6,\*</sup>**

<sup>1</sup>Max-Planck-Institute for Experimental Medicine, Translational Molecular Imaging, Göttingen, Germany

<sup>2</sup>DZHK (German Center for Cardiovascular Research), Partner site Göttingen, 37077 Göttingen, Germany

<sup>3</sup>Laboratory Animal Science Unit, German Primate Center, Leibniz Institute for Primate Research, Göttingen, Germany

<sup>4</sup>Stiftung Tierärztliche Hochschule Hannover, Hannover, Germany

<sup>5</sup>University Medical Center Göttingen, Institute for Diagnostic and Interventional Radiology & Clinic for Hematology and Medical Oncology, Göttingen, Germany

<sup>6</sup>Cluster of Excellence "Multiscale Bioimaging: from Molecular Machines to Networks of Excitable Cells," Göttingen, Germany

\*[falves@gwdg.de](mailto:falves@gwdg.de)

---

This supplement published with Optica Publishing Group on 19 October 2021 by The Authors under the terms of the [Creative Commons Attribution 4.0 License](https://creativecommons.org/licenses/by/4.0/) in the format provided by the authors and unedited. Further distribution of this work must maintain attribution to the author(s) and the published article's title, journal citation, and DOI.

Supplement DOI: <https://doi.org/10.6084/m9.figshare.16593029>

Parent Article DOI: <https://doi.org/10.1364/BOE.432102>

# Label-free imaging of age-related cardiac structural changes in non-human primates using multiphoton nonlinear microscopy : supplemental document

## Animal data

Table S1: Data for the common marmoset monkeys (*Callithrix jacchus*) including age, weight, and gender

| Age group   | Age (Years / months or Days) | Weight (g) | Gender |
|-------------|------------------------------|------------|--------|
| Old         | 11y / 0m                     | 306        | m      |
|             | 10y / 8m                     | 332        | m      |
|             | 13y / 3m                     | 336        | m      |
| Young Adult | 1y / 0m                      | 334        | m      |
|             | 2 y / 11m                    | 468        | m      |
|             | 4y / 4m                      | 560        | m      |
| Neonatal    | 24 days                      | 78         | f      |
|             | 4 days                       | 28.5       | m      |
|             | 6 days                       | 30.5       | m      |

## Sample preparation

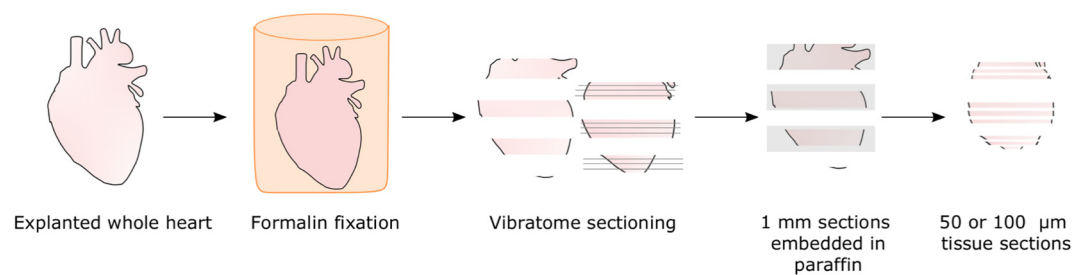

Fig. S1: Schematic for sample preparation. Excised hearts were fixed in formalin and sectioned using vibratome into 1 mm, 50 and 100  $\mu\text{m}$  tissue slices. 1 mm tissue slices were embedded in paraffin and then section into 2  $\mu\text{m}$  sections for histology. 50 and 100  $\mu\text{m}$  sections were used for NLOM imaging.

### Selection of the regions of interest (ROI)

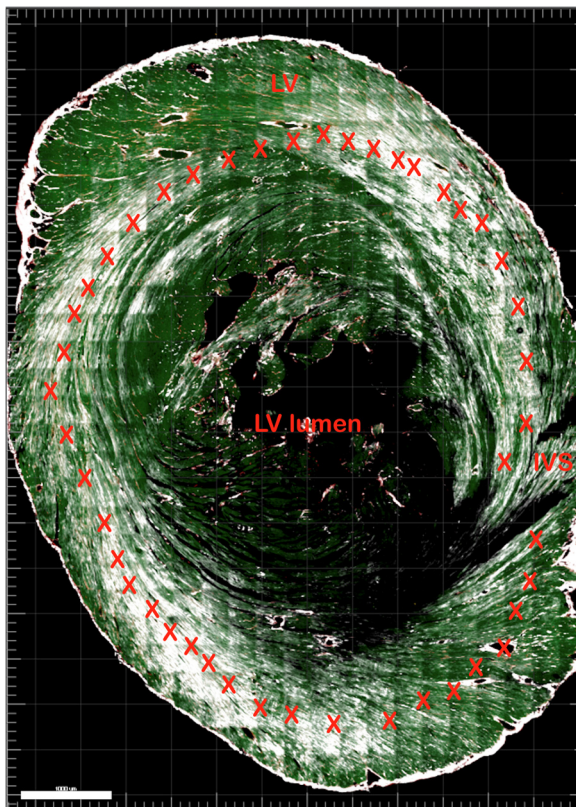

Fig. S2: Image of stitched cardiac tissue section obtained from a young adult heart. The red 'X' marks the ROI selection at the myocardial layer of the left ventricle (LV) and interventricular septum wall (IVS). All regions were selected randomly at the LV and IVS. Scale bar: 1000  $\mu\text{m}$ .

### Cardiac morphology in all age groups

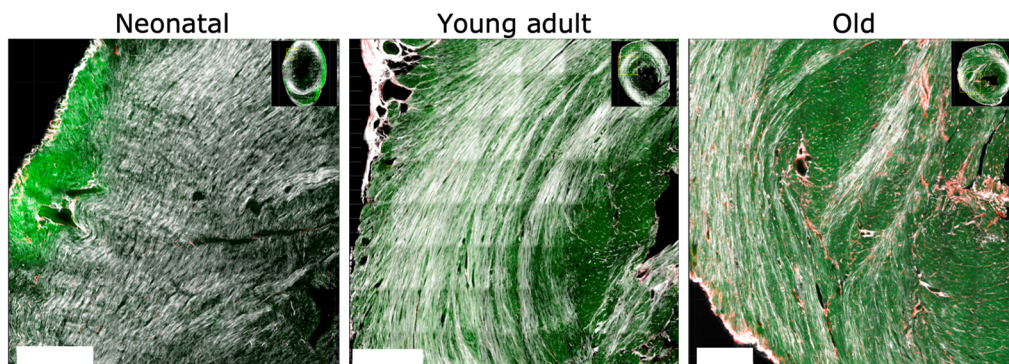

Fig. S3: Overview of NLOM label-free images in different age groups. Representative overview showing cardiac morphology in neonatal, young adult and old hearts for autofluorescence (green), backward SHG (red) and forward SHG (white). Scale bar: 200  $\mu\text{m}$ .

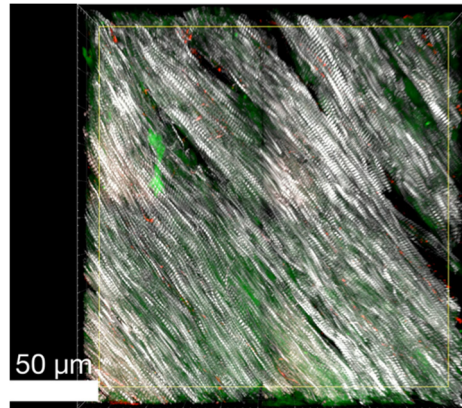

Visualization S1: SHG and TPEF signals showing cardiac structural composition neonatal heart. Supporting data for Figure 3.

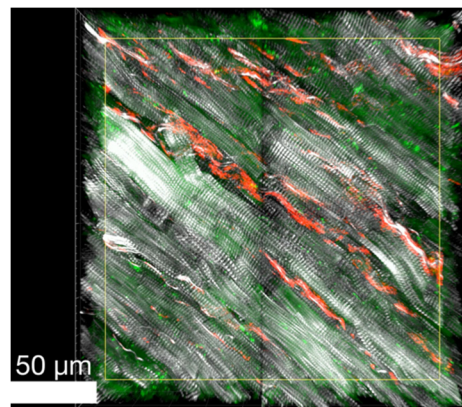

Visualization S2: SHG and TPEF signals showing cardiac structural composition young adult heart. Supporting data for Figure 3.

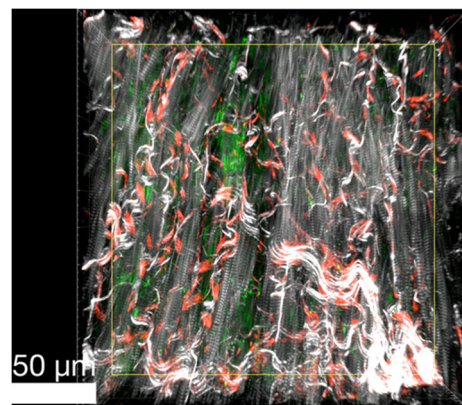

Visualization S3: SHG and TPEF signals showing cardiac structural composition old/geriatric heart. Supporting data for Figure 3.

### 3D rendering of a myofibril segment

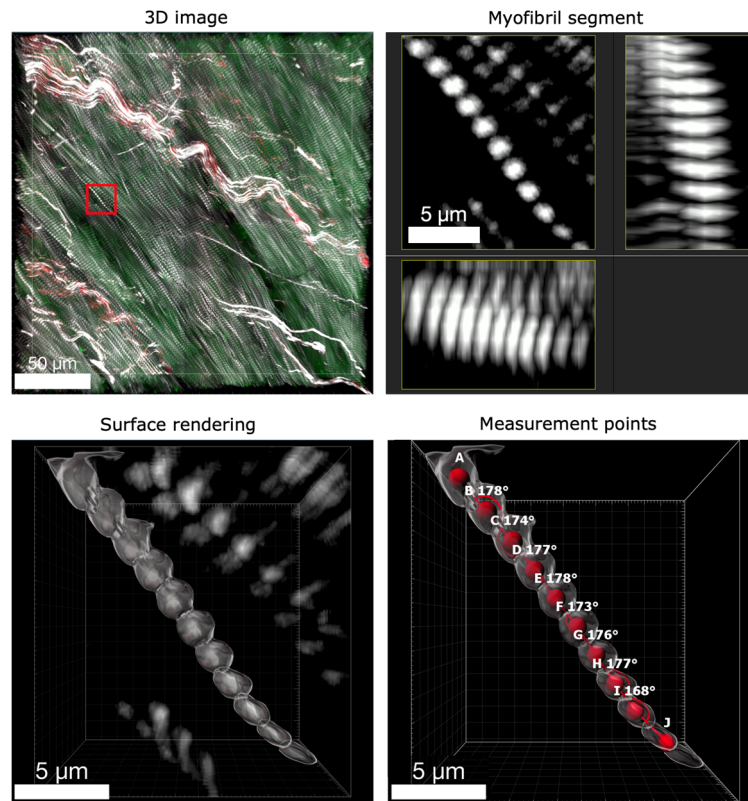

Fig. S4: Workflow for 3D surface rendering and angular distribution analysis along single myofibril segments. A segment of single myofibril was cropped from a 3D volume in xy, yz and xz plane to extract ten SH signal emitting A bands in an adult heart. 3D Surface rendering was performed on the isolated fragment of the myofibril. A measurement point was set at the center of mass for each A band. Angular distribution was determined between the measurement points.
